# Supplementary material for: A reversible single-molecule switch based on activated antiaromaticity
Source: PubMed Central journal article supplement — Sci Adv. 2017 Oct 27;3(10):eaao2615. doi: 10.1126/sciadv.aao2615 (PMC5659654; doi:10.1126/sciadv.aao2615), 2017-10-27

## Supplementary Materials for

### **A reversible single-molecule switch based on activated antiaromaticity**

Xiaodong Yin, Yaping Zang, Liangliang Zhu, Jonathan Z. Low, Zhen-Fei Liu, Jing Cui, Jeffrey B. Neaton, Latha Venkataraman, Luis M. Campos

Published 27 October 2017, *Sci. Adv.* **3**, eao2615 (2017)

DOI: 10.1126/sciadv.aao2615

#### **This PDF file includes:**

- Synthetic details
- DFT-optimized coordinates
- NMR and mass spectroscopy data
- fig. S1. UV-vis spectrum of **TBTP**.
- fig. S2. Steady-state linear absorption spectroscopy of **TBTP** obtained in a spectroelectrochemical setup.
- fig. S3. Steady-state linear absorption spectroscopy of **TBTP** and chemically oxidized **TBTP** dication.
- fig. S4. <sup>1</sup>H NMR of the neutral **TBTP** and dication obtained by chemical oxidation.
- fig. S5. STM-BJ measurements of **TBTP**.
- fig. S6. STM-BJ measurements of a reversible single-molecule switch and in situ LSV.
- fig. S7. Transmission calculations for the neutral **TBTP** molecule using standard DFT methods and with DFT +  $\Sigma$ .
- table S1. DFT calculation (GIAO-B3LYP/6-31G\*\*) of <sup>1</sup>H NMR of **TBTP** and **TBTP**<sup>2+</sup>.
- table S2. DFT-based NICS calculations of the aromaticity of rings.

## Synthetic details

2,2'-bis(4,4-dimethylthiochroman-6-yl)-8,8'-biindeno[2,1-b]thiophenylidene (**TBTP**)

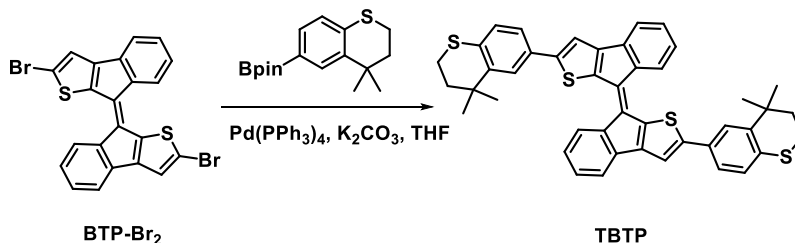

2,2'-dibromo-8,8'-biindeno[2,1-b]thiophenylidene (BTP-Br<sub>2</sub>)(25) 0.2 g 0.41 mmol and 2-(4,4-dimethylthiochroman-6-yl)-4,4,5,5-tetramethyl-1,3,2-dioxaborolane (Thiocroman-Bpin)(26) 0.273 g 0.90 mmol (2.2 eqv.) were added into a 50 mL schlenk flask, followed by the addition of 10 mL THF/H<sub>2</sub>O = 4:1. The mixture was purged with N<sub>2</sub> for 20 min, and then, a suspension of K<sub>2</sub>CO<sub>3</sub> (0.21g 1.5 mmol) in 1 mL water was added. While stirring the mixture under nitrogen for another 10 min, Pd(PPh<sub>3</sub>)<sub>4</sub> (60 mg, 0.05 mmol) was added in one portion, and the mixture was heated to reflux for 12h. The reaction was monitored by thin-layer chromatography (TLC). After the starting materials were consumed, the mixture was cooled to room temperature. The mixture was diluted with 50 mL of dichloromethane and washed with DI-water (100 mL×3). The organic phase was dried with MgSO<sub>4</sub>, filtered, and the solvent was removed under vacuum. The crude product was further purified by recrystallization to obtain the pure product as a black solid (0.18 g, 63%). <sup>1</sup>H NMR (500 MHz, CD<sub>2</sub>Cl<sub>2</sub>): δ 8.53 (d, *J* = 7.1 Hz, 2H), 7.67 (d, *J* = 2.0 Hz, 2H), 7.51 (d, *J* = 6.8 Hz, 2H), 7.42 (s, 2H), 7.36 – 7.26 (m, 6H), 7.11 (d, *J* = 8.2 Hz, 2H), 3.14 – 3.00 (m, 4H), 2.05 – 1.93 (m, 4H), 1.40 (s, 12H). <sup>13</sup>C NMR (126 MHz, CD<sub>2</sub>Cl<sub>2</sub>) δ 150.55, 150.34, 143.18, 141.72, 138.04, 137.59, 133.43, 130.51, 129.40, 127.36, 126.17, 125.54, 124.05, 123.75, 120.04, 114.72, 37.79, 33.49, 30.18, 23.59. Mass Spectrum: *m/z* = 693.1764 (calcd for C<sub>44</sub>H<sub>37</sub>S<sub>4</sub> ([M+H]<sup>+</sup>) 693.1778).

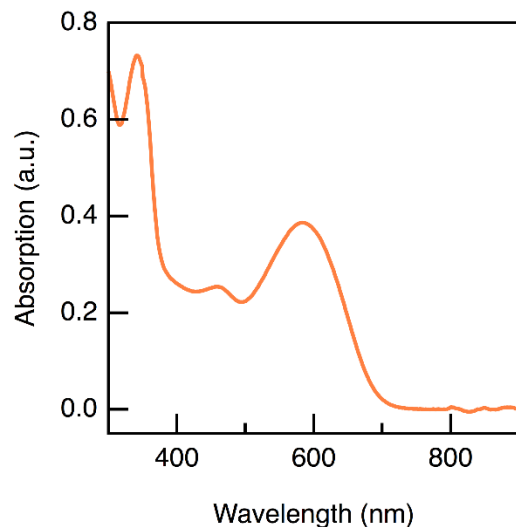

**fig. S1. UV-vis spectrum of TBTP.** UV-Vis spectrum of TBTP in dichloromethane ( $1 \times 10^{-5}$  M).

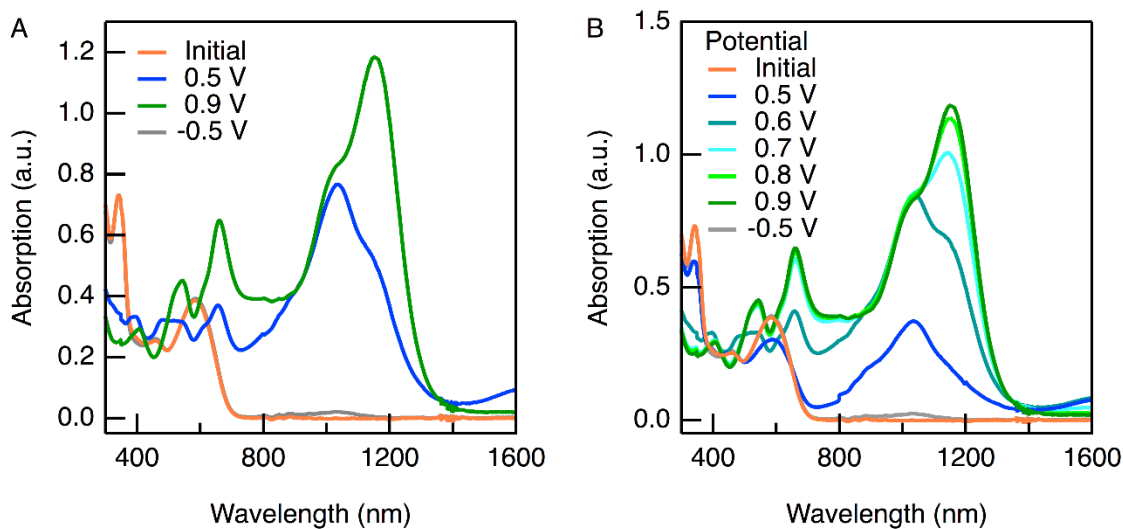

**fig. S2. Steady-state linear absorption spectroscopy of TBTP obtained in a spectroelectrochemical setup.** Steady-state linear absorption of TBTP in dichloromethane ( $1 \times 10^{-4}$  M) obtained in a spectroelectrochemical setup, using a gold honeycomb electrode as the working electrode, a Pt plate as the counter electrode (Au electrode and Pt electrodes are built on a single chip with a Teflon frame), Ag/AgCl electrode as the reference, and tetrabutylammonium hexafluorophosphate (0.1 M) as the supporting electrolyte. The absorption spectra were recorded as a function of potential applied to the working electrode relative to the reference electrode. A) Select spectra at key applied potentials. B) All recorded spectra showing reversible switching. All the potentials are reported versus ferrocene [Fc<sup>+/0</sup>].

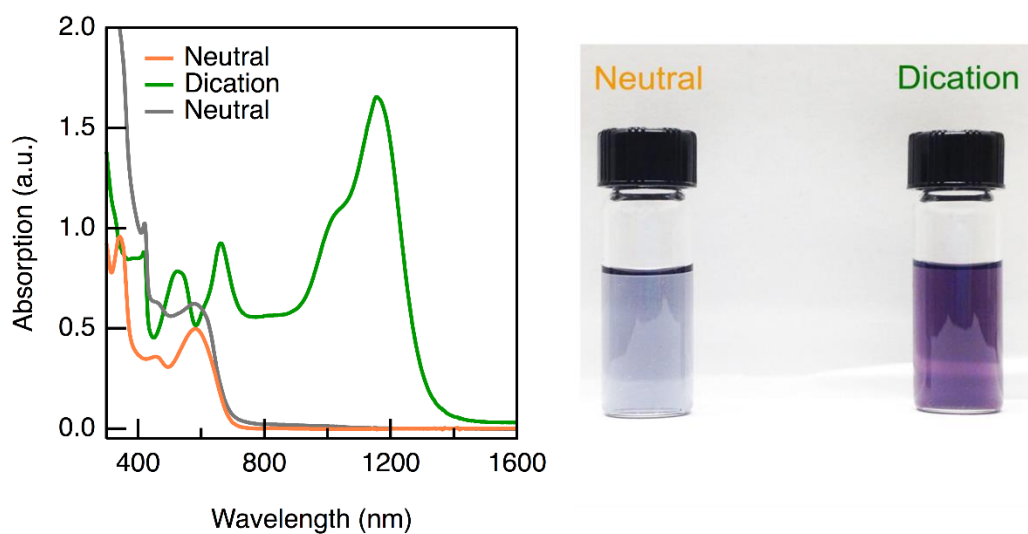

**fig. S3. Steady-state linear absorption spectroscopy of TBTP and chemically oxidized TBTP dication.** Steady-state linear absorption spectroscopy of neutral **TBTP** (orange) and chemically oxidized **TBTP** dication (green) in DCM ( $1 \times 10^{-5}$  M).  $\text{AgSbF}_6/\text{I}_2$  is used as the oxidant to obtain the dication, and ferrocene is used as reductant reversibly switch back to the neutral species (grey). Also shown are photograph of the neutral and dication solutions of **TBTP** in dichloromethane ( $1 \times 10^{-4}$  M).

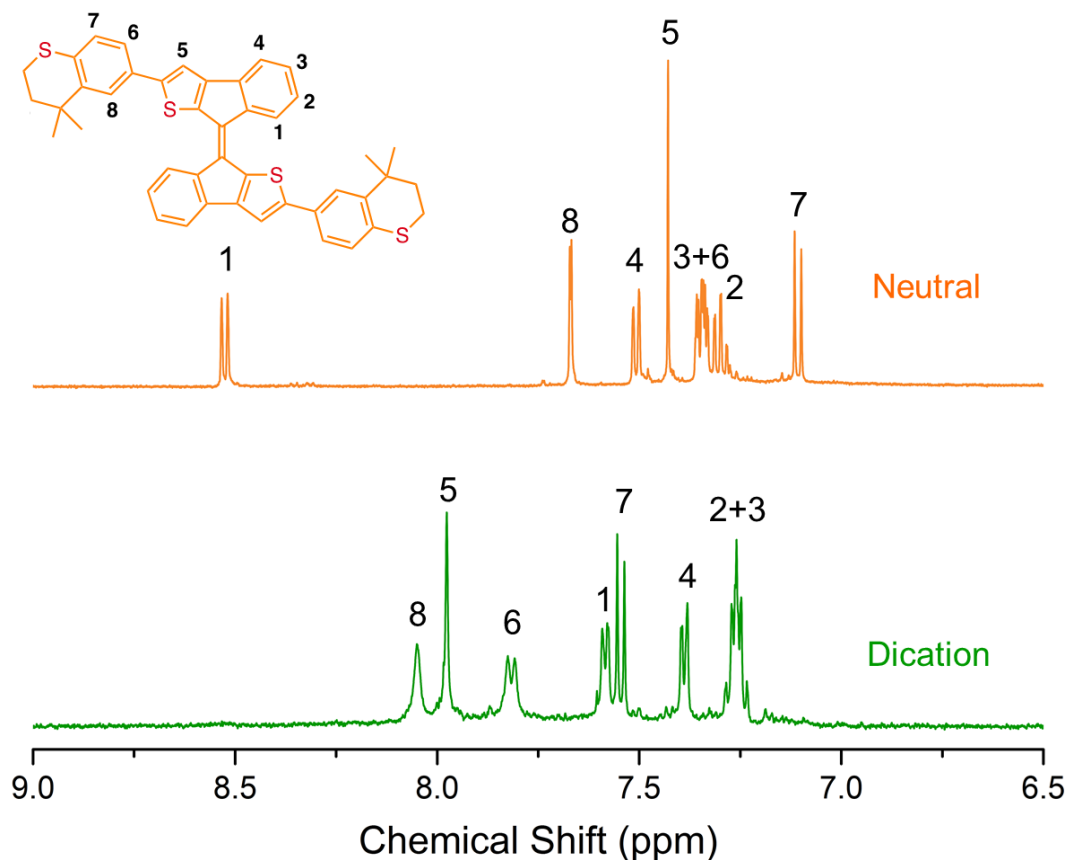

**fig. S4.  $^1\text{H}$  NMR of the neutral TBTP and dication obtained by chemical oxidation.**  $^1\text{H}$  NMR of the neutral **TBTP** (orange) and dication (green) obtained by chemical oxidation using  $\text{AgSbF}_6/\text{I}_2$  in  $\text{CD}_2\text{Cl}_2$ . after oxidation to the dication, the peak at  $\sim 8.5$  ppm in the neutral **TBTP** drastically shifts upfield to  $\sim 7.6$  ppm in the +2 state, while the other protons on the same benzene ring also exhibit a slight upfield shift. The aromatic proton signals on thiophene and thiocroman in the +2 state are slightly shifted downfield, likely due to the positive charge on the molecule, as observed in other systems. The proton assignments were corroborated by 2D-NMR (COSY) shown below.

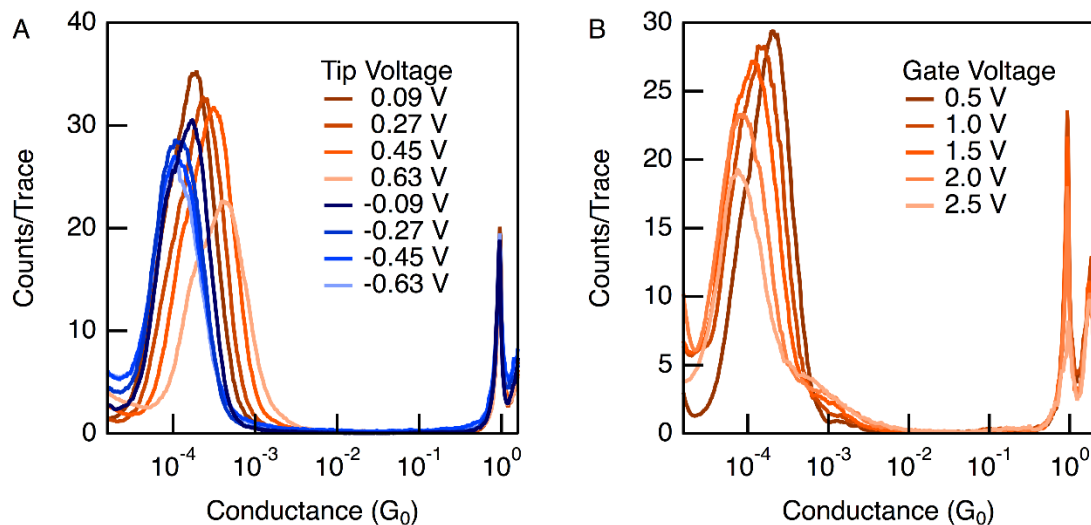

**fig. S5. STM-BJ measurements of TBTP.** (A) Logarithm-binned 1D histograms (100 bins/decade) for **TBTP** in propylene carbonate with tetrabutylammonium perchlorate (0.1 M) at tip biases ranging from -0.63 V to 0.63 V in steps of 0.18 V (tip relative to substrate). (B) Logarithm-binned 1D histograms for **TBTP** in propylene carbonate with tetrabutylammonium perchlorate (0.1 M) at different gate voltages (relative to substrate) as indicated in the figure.

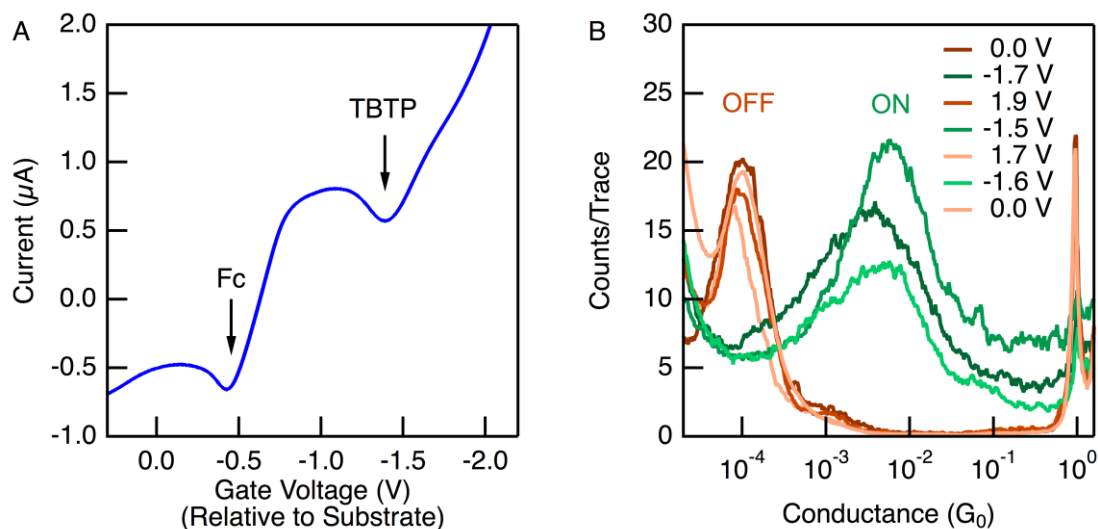

**fig. S6. STM-BJ measurements of a reversible single-molecule switch and in situ LSV.** (A) Logarithm-binned 1D histograms for **TBTP** in propylene carbonate with tetrabutylammonium perchlorate (0.1 M) as a function of gate voltage (applied relative to the substrate) showing reversible switching of the molecular junction conductance. (B) Linear Sweep Voltammetry of **TBTP** in propylene carbonate ( $\sim 100 \mu\text{M}$ ) with tetrabutylammonium perchlorate (0.1 M) as the electrolyte, and ferrocene ( $\sim 10 \mu\text{M}$ ) as internal reference. The data was recorded on the STM set up used for conductance measurement with a gold tip, coated with Apiezon wax as the working electrode, and a Pt gate electrode. As the gate potential is swept relative to substrate, the oxidation of ferrocene and **TBTP** were observed, and found at -0.4 V and -1.4 V, respectively as indicated by the arrows in the figure.

**table S1. DFT calculation (GIAO-B3LYP/6-31G\*\*) of  $^1\text{H}$  NMR of TBTP and TBTP $^{2+}$ .** The  $^1\text{H}$  NMR peak at carbon 1 moves largely upfield from 8.65 ppm to 7.35 ppm upon oxidation, while the others (carbon 2 through 7) move slightly downfield.

| Label of protons | Chemical Shift (ppm) |          |
|------------------|----------------------|----------|
|                  | Neutral              | Dication |
| 1                | 8.65                 | 7.35     |
| 2                | 7.24                 | 7.44     |
| 3                | 7.29                 | 7.45     |
| 4                | 7.41                 | 7.48     |
| 5                | 7.26                 | 7.47     |
| 6                | 7.48                 | 7.57     |
| 7                | 7.18                 | 7.72     |
| 8                | 7.81                 | 7.80     |

**table S2. DFT-based NICS calculations of the aromaticity of rings.** a, b and c as indicated in table S1. We see in general that the NICS value becomes more positive for all four rings (labeled a, b c and d in the figure adjacent to table S1) and is most positive for ring b, which is at the core of the **BTP** unit.

| Type                  | Redox States | a      | b     | c      | d      |
|-----------------------|--------------|--------|-------|--------|--------|
| NICS(1) <sub>zz</sub> | Neutral      | -18.46 | 11.54 | -13.70 | -20.20 |
|                       | Dication     | -6.88  | 33.05 | 2.40   | -12.34 |
| NICS(0)               | Neutral      | -5.73  | 4.15  | -16.55 | -5.08  |
|                       | Dication     | -0.95  | 13.23 | -10.64 | -3.98  |

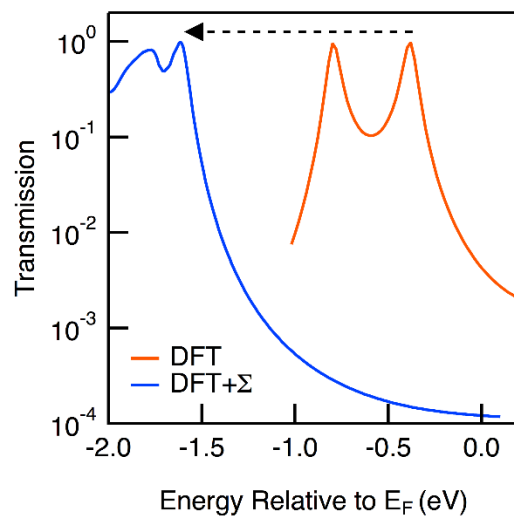

**fig. S7. Transmission calculations for the neutral TBTP molecule using standard DFT methods and with DFT +  $\Sigma$ .** Transmission as a function of energy for the neutral TBTP molecule using standard DFT (orange) methods and with DFT+ $\Sigma$  (blue). The zero-bias conductance for the PBE calculation is  $4.8 \times 10^{-3} G_0$  while DFT+ $\Sigma$  yields a conductance of  $1.2 \times 10^{-4} G_0$ , in good agreement with experimental value of about  $2 \times 10^{-4} G_0$  at a low bias. The good agreement on conductance suggests that our modeling of the junction geometry is realistic and can be compared to the experiment.



## DFT-optimized coordinates

Cartesian Coordinates for Optimized Structures with Gaussian 09 at B3LYP/6-31G\*\* for **TBTP** and **TBTP** dication.

### TBTP

| Element | Coordinates (angstroms) |          |          | Element | Coordinates (angstroms) |          |          |
|---------|-------------------------|----------|----------|---------|-------------------------|----------|----------|
|         | X                       | Y        | Z        |         | X                       | Y        | Z        |
| C       | 1.77444                 | -0.79019 | -0.85003 | C       | -9.59047                | -1.59036 | 1.2594   |
| C       | 0.36283                 | -0.5882  | -1.14857 | C       | -10.55483               | -0.41131 | 1.25146  |
| C       | -0.15943                | -1.96886 | -1.35954 | S       | -9.80573                | 1.06609  | 2.02407  |
| C       | 0.88253                 | -2.90828 | -1.12313 | C       | 7.43596                 | 2.64628  | 0.65386  |
| C       | -0.36282                | 0.58844  | -1.1485  | C       | 8.71836                 | 1.40072  | -1.11413 |
| C       | 0.15943                 | 1.96914  | -1.35929 | C       | -7.43562                | -2.64649 | 0.65385  |
| C       | -0.88254                | 2.90852  | -1.12283 | C       | -8.71847                | -1.40102 | -1.11386 |
| C       | -2.07386                | 2.14885  | -0.75757 | H       | 3.79488                 | -3.42157 | -0.19188 |
| C       | -1.77444                | 0.79039  | -0.84998 | H       | -3.79491                | 3.42169  | -0.19166 |
| C       | 3.37785                 | -2.42657 | -0.29258 | H       | -2.16331                | -1.72441 | -2.13392 |
| C       | 4.09363                 | -1.28121 | 0.00141  | H       | -2.54402                | -4.14396 | -2.40911 |
| S       | 3.12236                 | 0.16298  | -0.29108 | H       | -0.7546                 | -5.77452 | -1.88681 |
| C       | -3.37788                | 2.4267   | -0.29244 | H       | 1.47695                 | -4.98178 | -1.12007 |
| C       | -4.09369                | 1.2813   | 0.00139  | H       | 2.16338                 | 1.7248   | -2.13354 |
| S       | -3.12238                | -0.16285 | -0.29121 | H       | 2.54411                 | 4.1444   | -2.40834 |
| C       | -1.37902                | -2.419   | -1.85972 | H       | 0.75464                 | 5.77487  | -1.88595 |
| C       | -1.58677                | -3.79433 | -2.03435 | H       | -1.47697                | 4.98202  | -1.1195  |
| C       | -0.577                  | -4.71245 | -1.74566 | H       | -5.80767                | -0.78001 | -0.30122 |
| C       | 0.67621                 | -4.27079 | -1.30235 | H       | -7.82368                | 2.9787   | 2.15519  |
| C       | 1.37907                 | 2.41935  | -1.8593  | H       | -5.4872                 | 3.13175  | 1.42128  |
| C       | 1.58683                 | 3.79471  | -2.03371 | H       | 5.80791                 | 0.77978  | -0.30158 |
| C       | 0.57704                 | 4.71278  | -1.74497 | H       | 7.82321                 | -2.97858 | 2.15595  |
| C       | -0.67622                | 4.27106  | -1.30182 | H       | 5.48672                 | -3.13146 | 1.42194  |
| C       | 5.47025                 | -1.17711 | 0.48701  | H       | 9.29156                 | 1.79299  | 2.29383  |
| C       | -5.47033                | 1.17714  | 0.4869   | H       | 10.12347                | 2.48093  | 0.90221  |
| C       | -6.2499                 | 0.03293  | 0.26438  | H       | 11.44272                | 0.62796  | 1.85086  |
| C       | -7.57196                | -0.10647 | 0.70965  | H       | 10.88916                | 0.16295  | 0.23985  |
| C       | -8.14443                | 0.99228  | 1.3856   | H       | -9.29089                | -1.7931  | 2.2943   |
| C       | -7.37423                | 2.14561  | 1.62198  | H       | -10.12292               | -2.48155 | 0.903    |
| C       | -6.06181                | 2.23941  | 1.19583  | H       | -11.44239               | -0.62872 | 1.85164  |
| C       | 6.24999                 | -0.03307 | 0.26426  | H       | -10.8895                | -0.16407 | 0.2403   |
| C       | 7.57203                 | 0.10627  | 0.70963  | H       | 7.06536                 | 2.64855  | 1.68354  |
| C       | 8.14429                 | -0.9924  | 1.38587  | H       | 6.57323                 | 2.69717  | -0.01499 |
| C       | 7.37391                 | -2.14556 | 1.6225   | H       | 8.01654                 | 3.56232  | 0.49936  |
| C       | 6.06151                 | -2.23928 | 1.19628  | H       | 9.36114                 | 0.55153  | -1.36361 |
| C       | 8.32667                 | 1.41096  | 0.38365  | H       | 9.24925                 | 2.32258  | -1.37943 |

|   |          |          |          |   |          |          |          |
|---|----------|----------|----------|---|----------|----------|----------|
| C | 9.59087  | 1.58995  | 1.25891  | H | 7.82904  | 1.32922  | -1.74736 |
| C | 10.55489 | 0.41063  | 1.25103  | H | -7.06488 | -2.64879 | 1.68347  |
| S | 9.80559  | -1.06629 | 2.02435  | H | -6.57299 | -2.69729 | -0.01513 |
| C | -8.32648 | -1.41125 | 0.38383  | H | -8.01616 | -3.56257 | 0.49938  |
| H | -9.24945 | -2.32286 | -1.37906 | H | -9.36127 | -0.5518  | -1.36323 |
| H | -7.82927 | -1.32954 | -1.74725 |   |          |          |          |

### TBTP Dication

| Element | Coordinates (angstroms) |          |          | Element | Coordinates (angstroms) |          |          |
|---------|-------------------------|----------|----------|---------|-------------------------|----------|----------|
|         | X                       | Y        | Z        |         | X                       | Y        | Z        |
| C       | 1.70455                 | -0.77494 | -1.23423 | C       | 8.65833                 | 1.42946  | 2.78662  |
| C       | 0.38613                 | -0.60556 | -1.63643 | C       | 9.89418                 | 0.57365  | 2.54907  |
| C       | -0.10877                | -1.96585 | -2.01189 | S       | 9.48568                 | -1.13547 | 2.02021  |
| C       | 0.92124                 | -2.91471 | -1.7741  | C       | -7.71195                | -1.56439 | 1.56728  |
| C       | -0.38612                | 0.6056   | -1.63643 | C       | -8.65832                | -1.42951 | 2.78659  |
| C       | 0.10876                 | 1.9659   | -2.01188 | C       | -9.89418                | -0.57371 | 2.54906  |
| C       | -0.92125                | 2.91475  | -1.77406 | S       | -9.48567                | 1.13543  | 2.02024  |
| C       | -2.06603                | 2.17099  | -1.25165 | C       | 6.60689                 | 2.56576  | 1.96237  |
| C       | -1.70455                | 0.77497  | -1.23422 | C       | 8.47517                 | 2.12235  | 0.3392   |
| C       | 3.32171                 | -2.42369 | -0.76176 | C       | -6.60688                | -2.56581 | 1.96233  |
| C       | 3.99874                 | -1.24378 | -0.32696 | C       | -8.47516                | -2.12235 | 0.33916  |
| S       | 2.99326                 | 0.19607  | -0.55436 | H       | 3.76307                 | -3.40853 | -0.68842 |
| C       | -3.32171                | 2.42371  | -0.76171 | H       | -3.76307                | 3.40854  | -0.68836 |
| C       | -3.99874                | 1.24379  | -0.32694 | H       | -2.07474                | -1.65227 | -2.85288 |
| S       | -2.99326                | -0.19605 | -0.55436 | H       | -2.40548                | -4.05327 | -3.36611 |
| C       | -1.29704                | -2.36501 | -2.60258 | H       | -0.63352                | -5.70625 | -2.89012 |
| C       | -1.47679                | -3.731   | -2.90696 | H       | 1.53418                 | -4.98023 | -1.90454 |
| C       | -0.47848                | -4.66124 | -2.64437 | H       | 2.07472                 | 1.65233  | -2.8529  |
| C       | 0.74648                 | -4.25443 | -2.08057 | H       | 2.40545                 | 4.05333  | -3.3661  |
| C       | 1.29702                 | 2.36506  | -2.60258 | H       | 0.63349                 | 5.70631  | -2.89006 |
| C       | 1.47677                 | 3.73106  | -2.90694 | H       | -1.53419                | 4.98026  | -1.90447 |
| C       | 0.47846                 | 4.66129  | -2.64433 | H       | -5.27742                | -0.9679  | 0.5325   |
| C       | -0.74649                | 4.25447  | -2.08052 | H       | -7.94003                | 3.16301  | 1.06098  |
| C       | 5.30332                 | -1.16956 | 0.22977  | H       | -5.71711                | 3.31443  | 0.08953  |
| C       | -5.30331                | 1.16955  | 0.22979  | H       | 5.27743                 | 0.96789  | 0.53252  |
| C       | -5.87029                | -0.06831 | 0.64911  | H       | 7.94003                 | -3.16303 | 1.06091  |
| C       | -7.13478                | -0.19007 | 1.19498  | H       | 5.71711                 | -3.31443 | 0.08946  |
| C       | -7.895                  | 1.01553  | 1.34661  | H       | 8.09783                 | 1.0385   | 3.64364  |
| C       | -7.34722                | 2.26245  | 0.93518  | H       | 9.00565                 | 2.43003  | 3.06702  |
| C       | -6.09413                | 2.3451   | 0.39101  | H       | 10.4718                 | 0.44636  | 3.46796  |
| C       | 5.87029                 | 0.0683   | 0.6491   | H       | 10.55692                | 1.00144  | 1.79326  |
| C       | 7.13479                 | 0.19005  | 1.19498  | H       | -8.09783                | -1.03858 | 3.64362  |

|   |          |          |          |   |           |          |          |
|---|----------|----------|----------|---|-----------|----------|----------|
| C | 7.89501  | -1.01556 | 1.34659  | H | -9.00564  | -2.43009 | 3.06697  |
| C | 7.34723  | -2.26247 | 0.93513  | H | -10.47179 | -0.44644 | 3.46795  |
| C | 6.09413  | -2.34511 | 0.39096  | H | -10.55691 | -1.00148 | 1.79324  |
| C | 7.71195  | 1.56436  | 1.56731  | H | 5.984     | 2.18302  | 2.77701  |
| H | -5.98399 | -2.18307 | 2.77697  | H | 5.95861   | 2.82668  | 1.121    |
| H | -5.95861 | -2.82671 | 1.12095  | H | 7.06673   | 3.49829  | 2.30096  |
| H | -7.06673 | -3.49834 | 2.3009   | H | 9.24451   | 1.43641  | -0.02642 |
| H | -9.24451 | -1.4364  | -0.02645 | H | 8.95737   | 3.07215  | 0.59251  |
| H | -8.95736 | -3.07216 | 0.59245  | H | 7.78529   | 2.30572  | -0.48974 |
| H | -7.78529 | -2.30572 | -0.48978 |   |           |          |          |

---

# NMR and mass spectroscopy data

<sup>1</sup>H NMR of TBTP (CD<sub>2</sub>Cl<sub>2</sub>, 25°C)

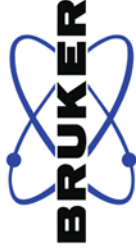

Current Data Parameters  
NAME 160315\_yxd\_TBTP@CD2Cl2  
EXPNO 65  
PROCNO 1  
F2 - Acquisition Parameters  
Date\_ 20170315  
Time 14.50 h  
INSTRUM spect  
PROBHD Z114229\_0006 (zg30)  
PULPROG 37498  
SOLVENT CD2Cl2  
NS 32  
DS 0  
SWH 7500.000 Hz  
FIDRES 0.400021 Hz  
AQ 2.4998667 sec  
RG 228  
DW 66.667 usec  
DE 6.50 usec  
TE 300.0 K  
D1 1.50000000 sec  
ID0 1  
SFO1 500.1330885 MHz  
NUC1 1H  
F1 12.90 usec  
PLW1 16.98200035 W  
F2 - Processing parameters  
SI 65536  
SF 500.1300197 MHz  
WDW EM  
SSB 0  
LB 0.20 Hz  
GB 0  
PC 1.00

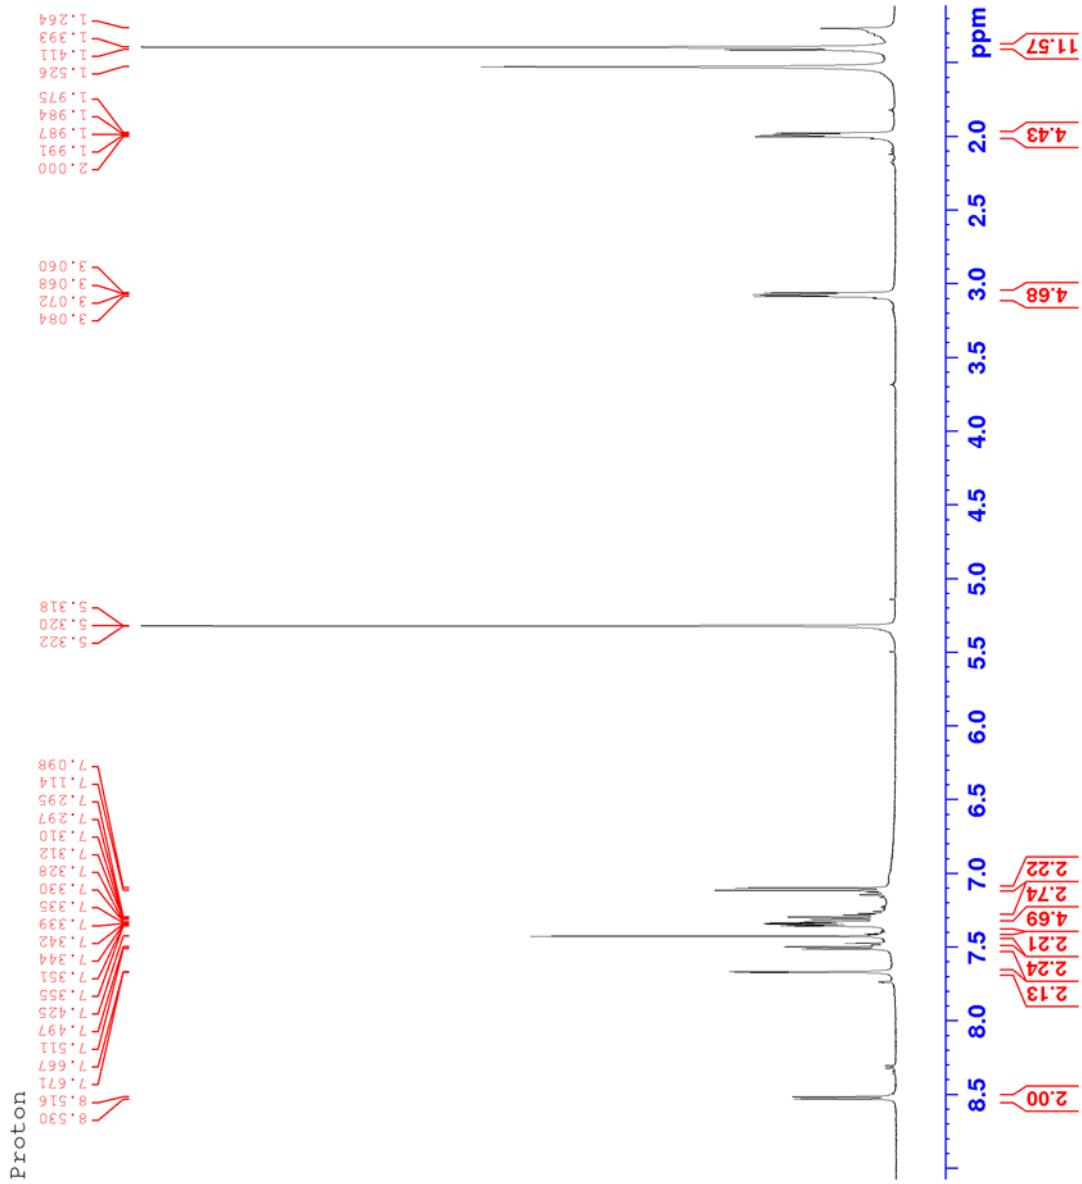

<sup>13</sup>C NMR of TBTP (CD<sub>2</sub>Cl<sub>2</sub>, 25°C)

Carbon 13

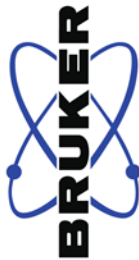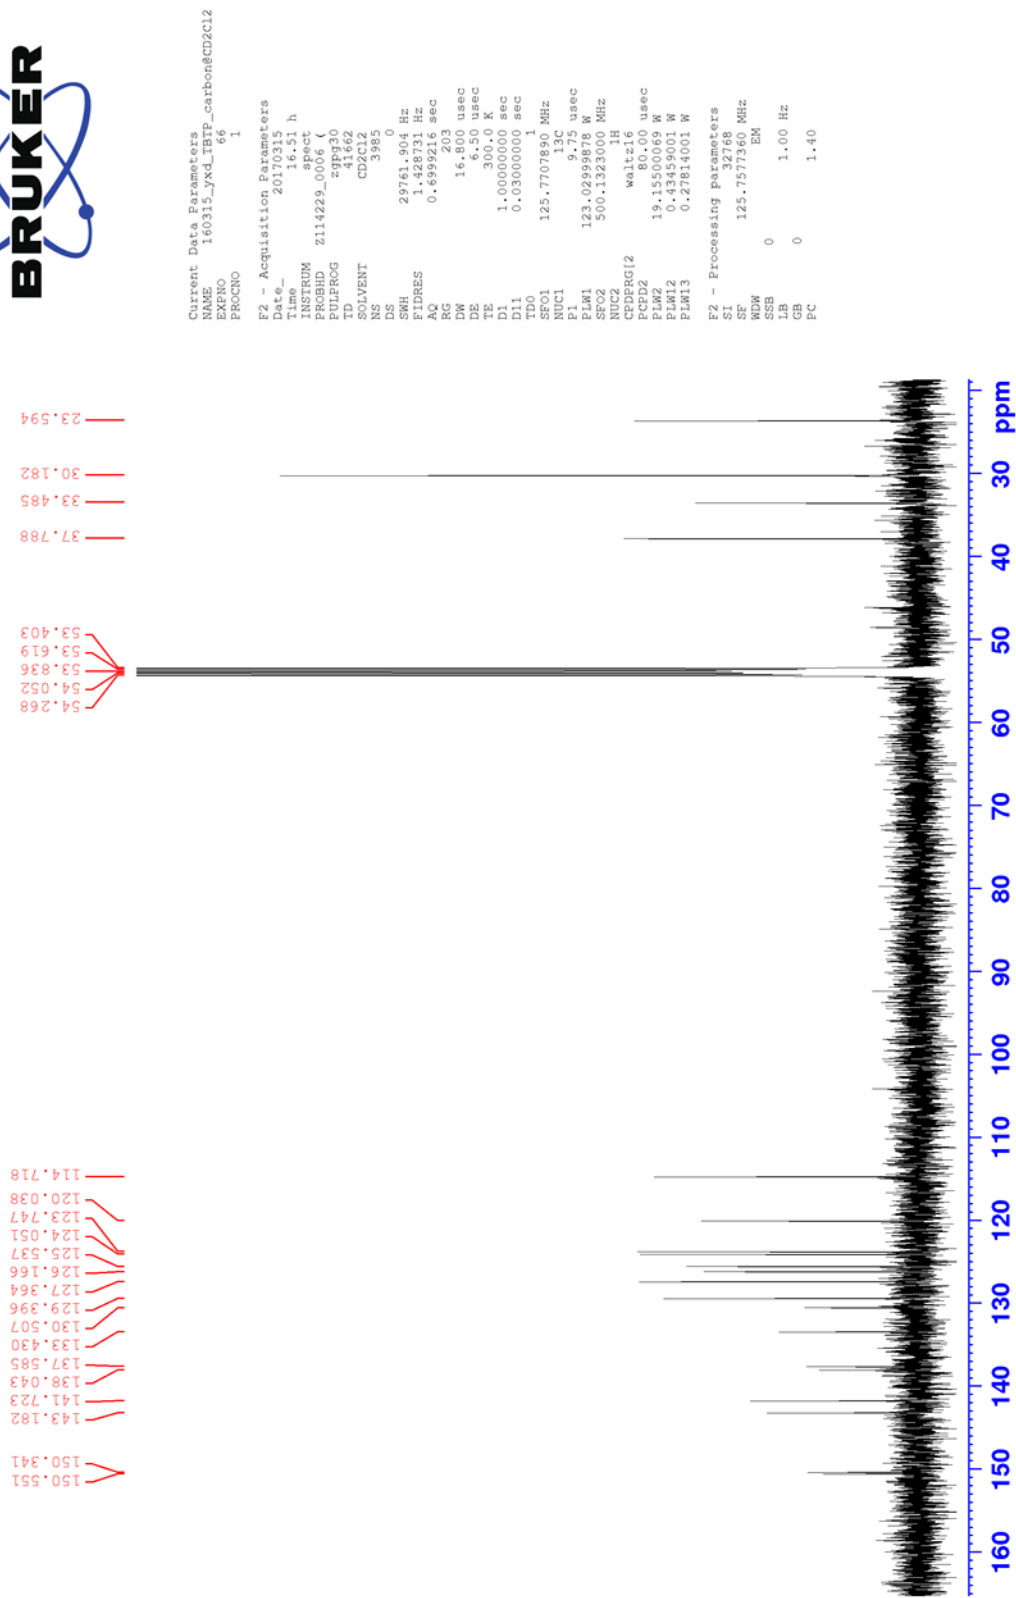

# Hi-Res Mass Spectrum of TBTP

XY-TBTP\_ESCIPos (0.533) Is (0.05,1.00) C44H36S4H

1: TOF MS AP+  
5.05e12

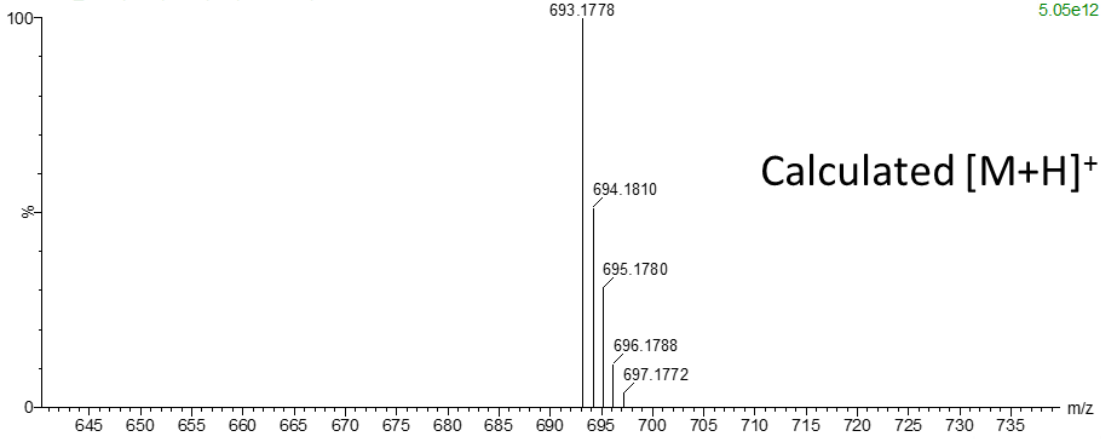

XY-TBTP\_ESCIPos 14 (0.499) Cm (13:16-2.6x1.500)

1: TOF MS AP+  
2.13e6

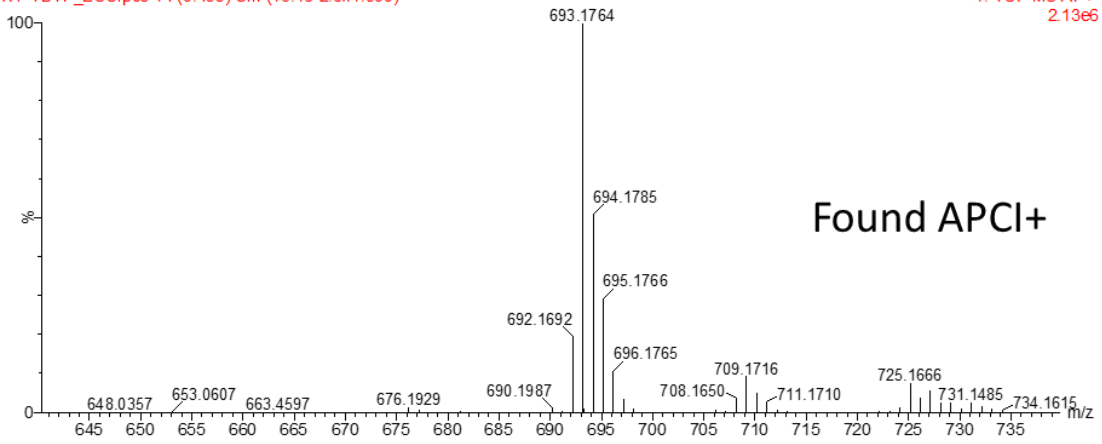

<sup>1</sup>H NMR of TBTP<sup>2+</sup> (CD<sub>2</sub>Cl<sub>2</sub>, 25°C)

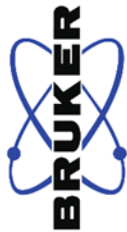

```

Current: Data Parameters
NAME: 75320_0wd_1LH_CD2Cl2C12
EXPNO: 1
PROCNO: 1

F2 - Acquisition Parameters
Date_UTC: 201712
Time: 11:43
INSTRUM: spect
PROBHD: Z14Z23_5006 (
PULPROG: zgpg30
TD: 32768
SOLVENT: CDCl2
DS: 4
SS: 0
SWH: 7500.000 Hz
FIDRES: 0.400021 Hz
AQ: 2.499667 sec
RG: 327.2
AQ2: 66.550 msec
SFO: 500.130885 MHz
D1: 1.5000000 sec
DELTA: 1
SFO2: 500.130885 MHz
NUC1: 1H
NUC2: 13C
ZGPG: 16.9820035 M

F2 - Processing parameters
SI: 65536
SF: 500.130190 MHz
WDW: EM
SSB: 0
LB: 0.20 Hz
GB: 0
PC: 1.00
  
```

Proton

8.050  
7.976  
7.825  
7.808  
7.591  
7.579  
7.554  
7.537  
7.397  
7.394  
7.381  
7.285  
7.272  
7.263  
7.259  
7.247  
7.234

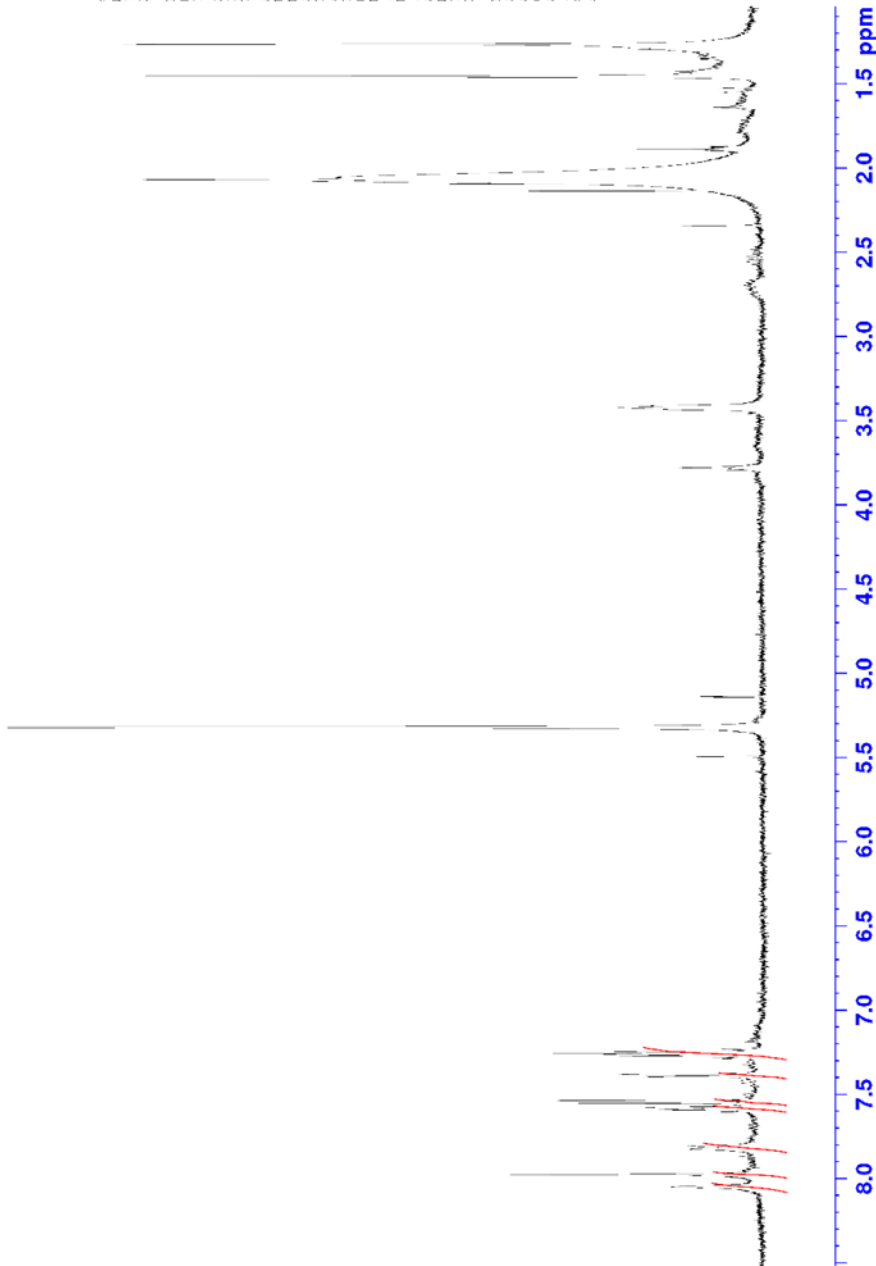

2.00  
1.96  
2.21  
1.93  
1.82  
3.79

COSY Spectrum of **TBTP** (CD<sub>2</sub>Cl<sub>2</sub>, 25°C)

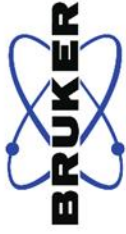

```

Current Data Parameters
NAME      1603C_1x4_TBTP_cosy002C-2
EXPNO    55
PROCNO   1
F2 - Acquisition Parameters
Date_    20170307
Time     15.7 h
INSTRUM  spect
PULPROG  zgpg30
PCPRG2   compset2
PCPRG1   1124
SOLVENT  CD2CL2
NS       4
DS       4
SWH      5000.306 Hz
FIDRES   9.785625 Hz
AQ       5.1084370 sec
RG       228
AQ       5.1084370 sec
LB        100.000 uspc
GB        0
PC        800.0 K
DC        0.0000000 sec
EC        2.0000000 sec
EL1      3.0000000 sec
EL2      3.0000000 sec
NUC1     13C
NUC2     13C
TD0      1
SFO1     500.1325007 MHz
NUC1     13C
NUC2     13C
PC       15.75 uspc
R7       2650.00 uspc
P1M1     16.98200035 W
P1M2     3.06739098 W
M1 - Acquisition Parameters
SI - Processing parameters
SFO1     500.1325 MHz
FIDRES   25.082500 Hz
SF       500.1300204 MHz
WDW       0
SSB       0 Hz
LB        0 Hz
GB        0
PC        1.00
E1 - Processing parameters
SI - Processing parameters
SFO1     500.1300195 MHz
WDW       0
SSB       0 Hz
LB        0 Hz
GB        0
PC        1.00
  
```

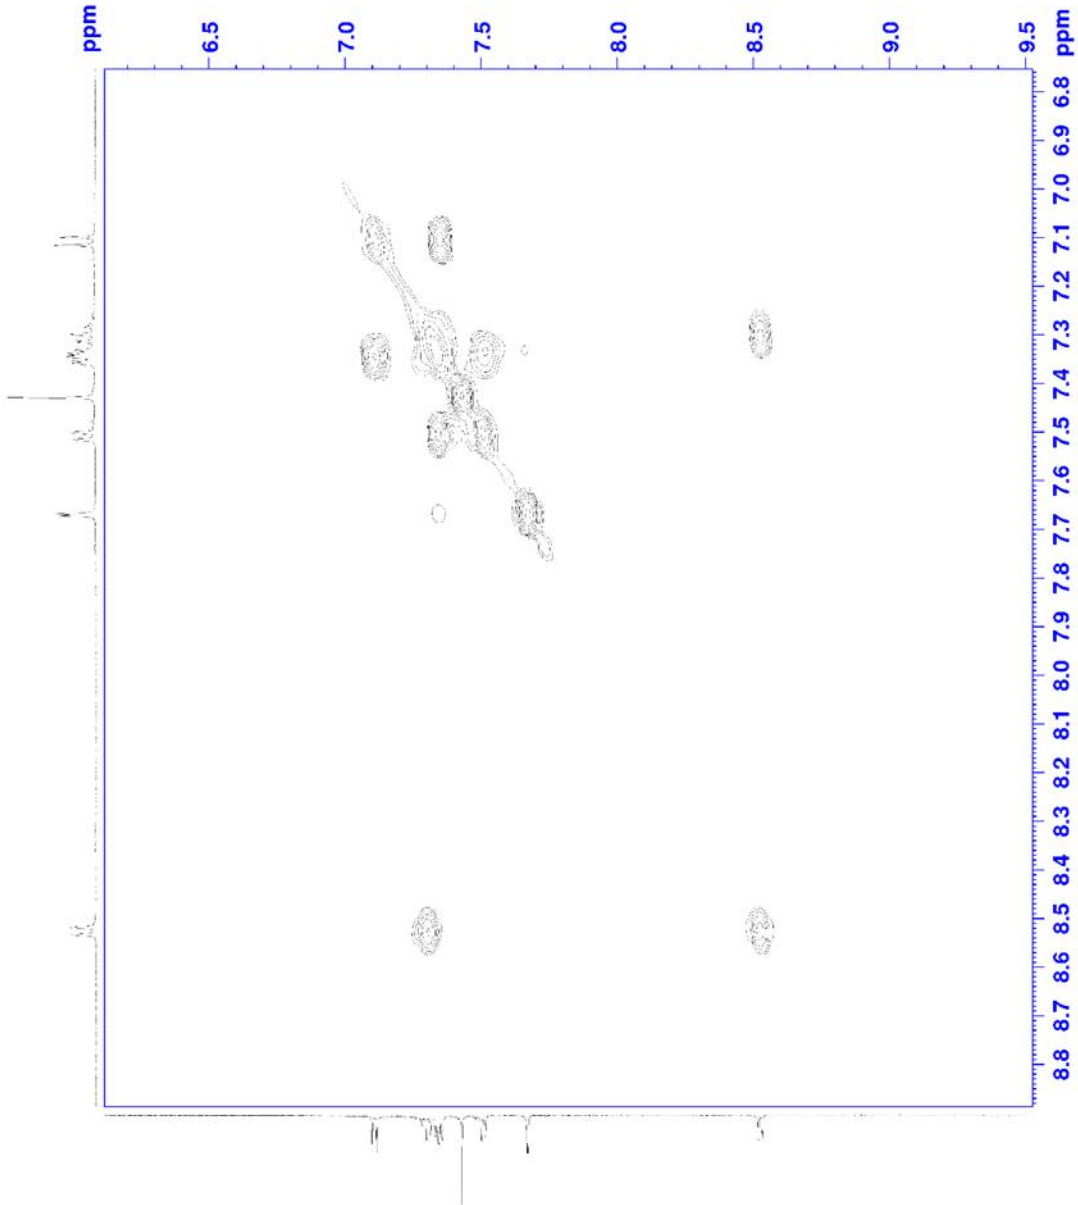

Supplement: aao2615_SM.pdf [file aao2615_SM.pdf]
